# Supplementary material for: A quantum dot-silica composite as an efficient spectral converter in a luminescent down-shifting layer of organic photovoltaic devices
Source: Royal Society of Chemistry journal article supplement (doi:10.1039/c9nj04080c), 2019-01-01
Supplement: c9nj04080c1.pdf [file c9nj04080c1.pdf]

## Electronic Supplementary Information

# Quantum Dots-Silica Composite as an Efficient Spectral Converter in a Luminescence Down-Shifting Layer of Organic Photovoltaic Devices

Hong Chul Lim<sup>‡,a</sup> Ja-jung Koo<sup>‡,a</sup> Jae Il Kim,<sup>b</sup> Jin-Kyu Lee,<sup>a</sup> Zee Hwan Kim,<sup>a</sup> and Jong-In Hong<sup>\*,a</sup>

<sup>a</sup> Department of Chemistry, Seoul National University, Seoul 08826, Republic of Korea

<sup>b</sup> QDBrick Co, Ltd #401 Backlim Bldg., 31-3, Maeheon-ro, Seocho-gu, Seoul, Republic of Korea

[jihong@snu.ac.kr](mailto:jihong@snu.ac.kr) (J.-I. Hong)

## List of contents

- Figure S1 UV-Vis absorption and PL emission spectra of CdSe, CdSe@ZnS, and gradient QDs
- Figure S2 XRD spectrum of OA-coated gradient QDs
- Figure S3 UV-Vis absorption and PL emission spectra of QDs after acid or base treatment
- Figure S4 Photograph of QDs-silica film on a slide glass
- Figure S5 SEM images of 0.1 wt% QDs-silica thin films
- Figure S6 SEM images of QDs-silica thin films as a function of QDs concentration
- Figure S7. IPCE data of BHJ OPV devices
- Figure S8 Theoretically expected PCE values of solar cells calculated from NREL data.
- Figure S9 Photoluminescence quantum yields (PLQYs) of the as-synthesized QDs solution, LDS layer with 0.1 wt% QDs, and LDS layer with 0.5 wt% QDs

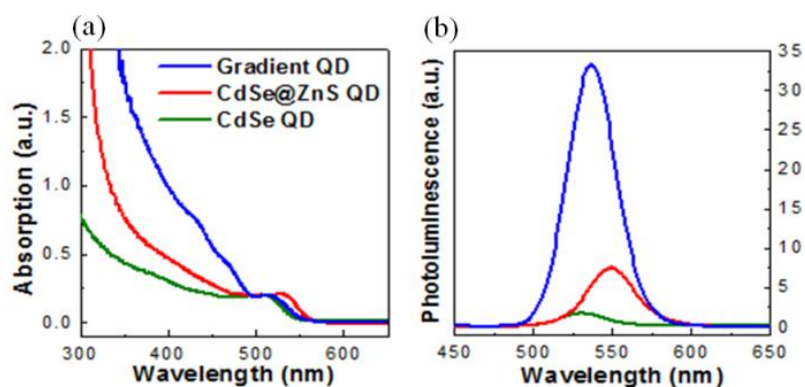

Fig. S1. (a) UV-Vis absorption and (b) PL emission spectra of CdSe (green), CdSe@ZnS (red), and gradient QDs (blue).

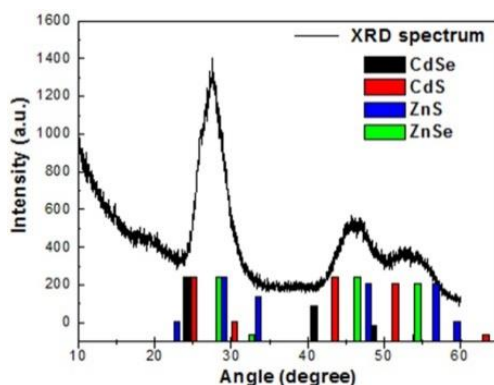

Fig. S2. XRD spectrum of OA-coated gradient QDs (black solid line) (inserted reference of bulk CdSe (black bar), CdS (red bar), ZnS (blue bar), and ZnSe (green bar)).

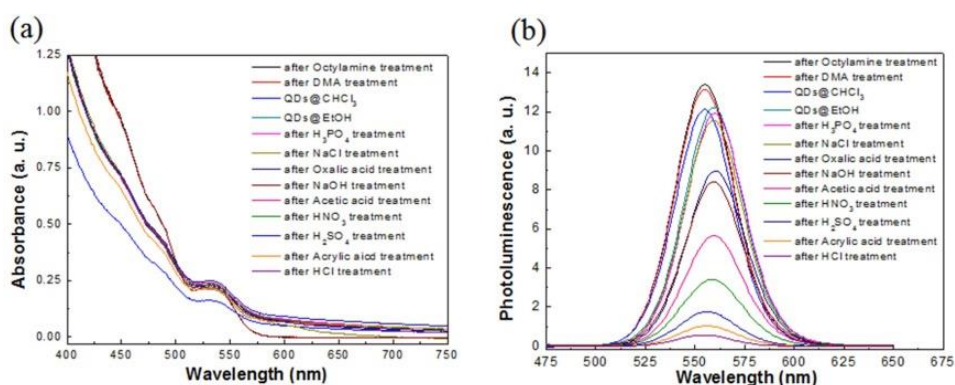

Fig. S3. Changes of (a) UV-Vis absorption, and (b) photoluminescence intensity after acid or base treatment of QDs. We injected 1 ml acid or base solution into QDs and then measured optical properties after 1 h.

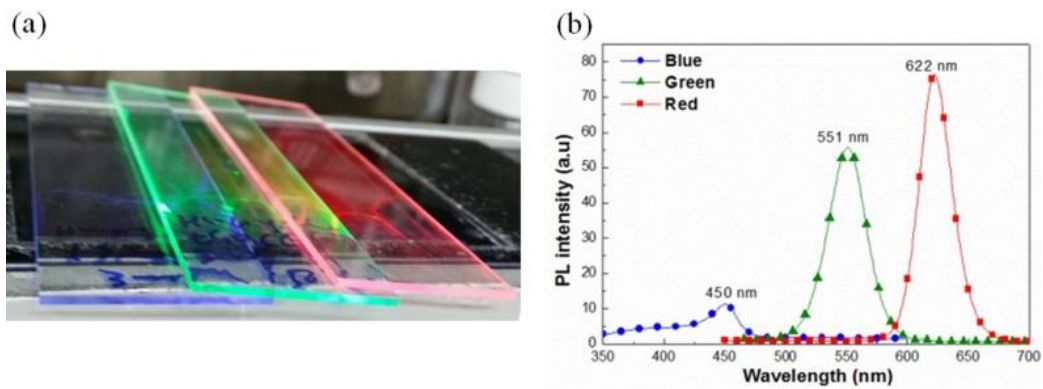

Fig. S4. (a) Photograph of blue, green and red light emission (b) PL emission spectra from QDs-silica composite films on a slide glass.

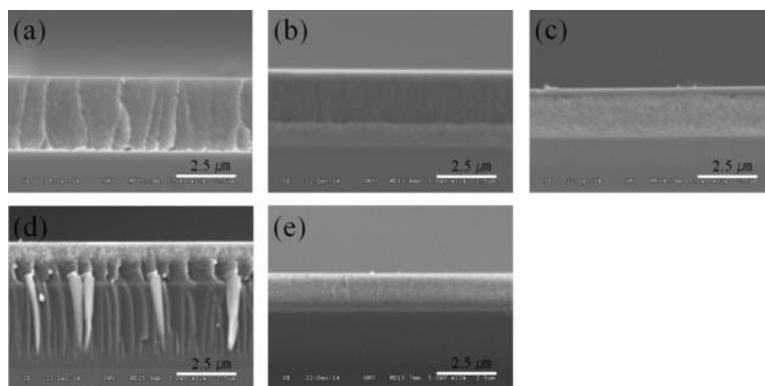

**Figure S5.** SEM images of (a) 3.1 μm, (b) 3.0 μm, (c) 2.0 μm, (d) 1.7 μm, (e) 1.5 μm thickness of 0.1 wt% QDs-silica thin films as a luminescent down-shifting layer.

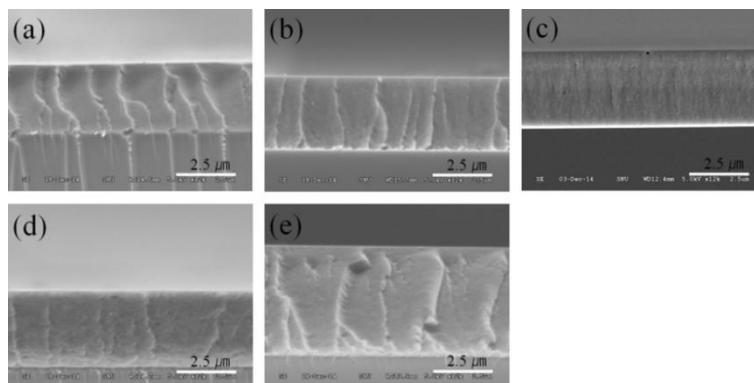

**Figure S6.** SEM images of (a) 0 wt%, (b) 0.1 wt%, (c) 0.2 wt%, (d) 0.3 wt%, and (e) 0.5 wt% of QDs-silica thin films.

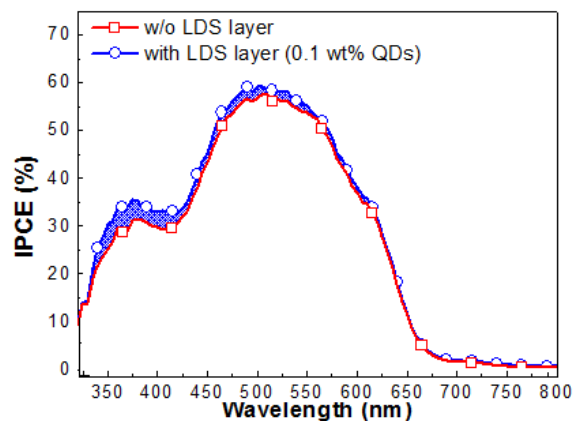

**Figure S7.** IPCE data of BHJ OPV devices. (line with open circle: with the LDS layer of 0.1 wt% QDs, line with open rectangle: without the LDS layer).

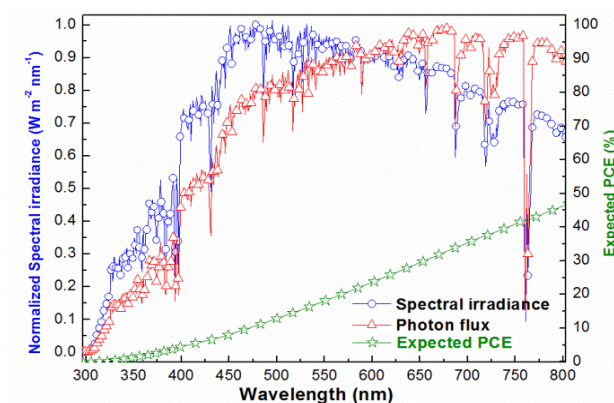

**Figure S8.** Theoretically expected PCE values of solar cells calculated from NREL (National Renewable Energy Laboratory) data.

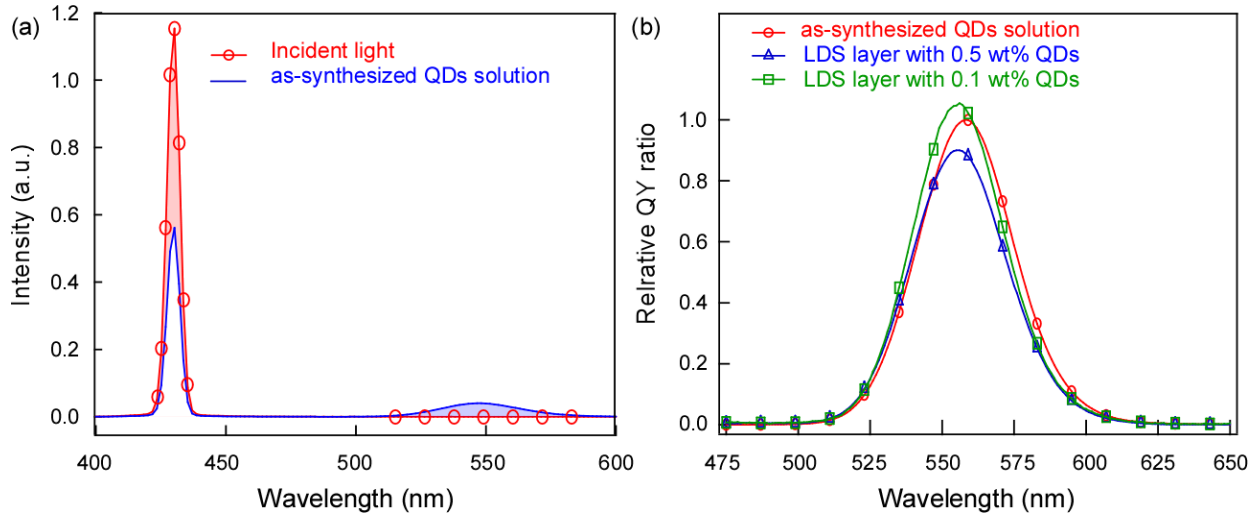

**Figure S9.** (a) Photoluminescence quantum yields (PLQYs) of the as-synthesized QDs solution in hexane (excitation: 430 nm). The PLQY was calculated to be 52.1 %. (b) PLQY ratios of the QDs solution, the LDS layer with 0.1 wt% QDs, and the LDS layer with 0.5 wt% QDs. The QYs of the LDS layers with 0.1 wt% QDs and 0.5 wt% QDs were calculated to be 53.7 and 46.7%, respectively. (line with open circle: as-synthesized QDs solution, line with open rectangle: LDS layer with 0.1 wt% QDs, and line with open triangle: LDS layer with 0.5 wt% QDs)

Quantum yield (QY) of QDs solution was measured to be 52.1% (Figure S9 (a)). Based on this result, the relative QYs of the LDS layers with 0.1 wt% and 0.5 wt% were estimated by eq 1 and eq 2, respectively.<sup>1</sup>

$$QY_{LDS \text{ layer with } 0.5 \text{ wt\% QDs}} = QY_{reference} \times \frac{Abs_{reference}}{Abs_{LDS \text{ layer with } 0.5 \text{ wt\% QDs}}} \times \frac{PL_{LDS \text{ layer with } 0.5 \text{ wt\% QDs}}}{PL_{reference}} \times \frac{n_{LDS \text{ layer}}^2}{n_{reference}^2} \dots\dots(1)$$

$$QY_{LDS \text{ layer with } 0.1 \text{ wt\% QDs}} = QY_{LDS \text{ layer with } 0.5 \text{ wt\% QDs}} \times \frac{PL_{LDS \text{ layer with } 0.1 \text{ wt\% QDs}}}{PL_{LDS \text{ layer with } 0.5 \text{ wt\% QDs}}} \times \frac{Conc_{LDS \text{ layer with } 0.5 \text{ wt\% QDs}}}{Conc_{LDS \text{ layer with } 0.1 \text{ wt\% QDs}}} \times \frac{Thickness_{LDS \text{ layer with } 0.5 \text{ wt\% QDs}}}{Thickness_{LDS \text{ layer with } 0.1 \text{ wt\% QDs}}} \dots\dots(2)$$

Where reference is QDs solution, QY is PLQY, Abs is absorption, PL is photoluminescence, and  $n$  denotes refractive index. The values of parameters were summarised below.

|                                                                             |                                                                            |                                                                                                               |                                                            |
|-----------------------------------------------------------------------------|----------------------------------------------------------------------------|---------------------------------------------------------------------------------------------------------------|------------------------------------------------------------|
| $\frac{Abs_{reference}}{Abs_{LDS \text{ layer with } 0.5 \text{ wt\% QDs}}$ | $\frac{PL_{LDS \text{ layer with } 0.5 \text{ wt\% QDs}}}{PL_{reference}}$ | $\frac{PL_{LDS \text{ layer with } 0.1 \text{ wt\% QDs}}}{PL_{LDS \text{ layer with } 0.5 \text{ wt\% QDs}}}$ | $PL_{LDS \text{ layer with } 0.5 \text{ wt\% QDs}}$        |
| 1.98                                                                        | 0.44                                                                       | 0.14                                                                                                          | 431.99                                                     |
| $PL_{LDS \text{ layer with } 0.1 \text{ wt\% QDs}}$                         | $PL_{reference}$                                                           | $Thickness_{LDS \text{ layer with } 0.5 \text{ wt\% QDs}}$                                                    | $Thickness_{LDS \text{ layer with } 0.1 \text{ wt\% QDs}}$ |
| 60.52                                                                       | 982.89                                                                     | 4.6 $\mu\text{m}$                                                                                             | 2.8 $\mu\text{m}$                                          |
| $Conc_{LDS \text{ layer with } 0.5 \text{ wt\% QDs}}$                       | $Conc_{LDS \text{ layer with } 0.1 \text{ wt\% QDs}}$                      | $n_{LDS \text{ layer}}$                                                                                       | $n_{reference}$                                            |
| 0.5                                                                         | 0.1                                                                        | 1.40                                                                                                          | 1.38                                                       |

## Reference

1. J. Laverdant, W. D. de Marcillac, C. Barthou, V. D. Chinh, C. Schwob, L. Coolen, P. Benalloul, P. T. Nga and A. Maître, *Materials*, 2011, **4**, 1182-1193.
